# Supplementary material for: Interpreting pathways to discover cancer driver genes with Moonlight
Source: PubMed Central journal article supplement (PMC6941958; doi:10.1038/s41467-019-13803-0), 2020-01-03
Supplement: 41467_2019_13803_MOESM3_ESM.pdf [file 41467_2019_13803_MOESM3_ESM.pdf]

## **Description of Additional Supplementary Files**

**Supplementary Data 1:** 500 Relevant Biological processes from Ingenuity Pathway Analysis (IPA)

**Supplementary Data 2:** Biological processes selected for Moonlight

**Supplementary Data 3:** Summary of TCGA RNA-seq samples and Differentially Expressed Genes (Tumor vs normal analysis) in 18 cancer types.

**Supplementary Data 4:** Functional enrichment Analysis results using the 3390 DEGs between normal and tumor TCGA breast samples

**Supplementary Data 5:** CDGs for TCGA BRCA molecular subtypes

**Supplementary Data 6:** Moonlight's oncogenic mediators in 18 cancer types

**Supplementary Data 7:** TCGA 18 tumor types DMRs overlapping with OCGs and TSG

**Supplementary Data 8:** Moonlight's oncogenic mediators associated to chromatin accessibility

**Supplementary Data 9:** Moonlight's oncogenic mediators associated to copy number changes

**Supplementary Data 10:** Moonlight's oncogenic mediators associated to mutation types

**Supplementary Data 11:** Moonlight's oncogenic mediators associated with survival outcome in 18 cancer types with good or poor prognosis

**Supplementary Data 12:** Connectivity MAP analysis of cancer driver genes identified as target of specific compounds

**Supplementary Data 13:** Moonlight's oncogenic mediators validated by cancer cell lines experiments

**Supplementary Data 14:** ROMA's results with TCGA BRCA

**Supplementary Software 1:** Package vignette with R scripts to reproduce the results and figures
